# Supplementary material
Source: ML conference proceedings conference paper supplement (https://openreview.net/forum?id=0k_DN90uWF)
Supplement: supplementary_material [file attachment]

$$\{(x_i, y_i)\}_{i=1}^m$$

$$D_t$$

$$h_t$$

$$\{h_t(x_i)\}_{i=1}^m$$

$$\omega_t$$
